# 1 Fine-scale quantification of GC-biased gene conversion intensity 2 in mammals.

3 Nicolas Galtier

4 ISEM - Univ Montpellier - CNRS - IRD

## 5 Abstract

6 GC-biased gene conversion (gBGC) is a molecular evolutionary force that favours GC over AT  
7 alleles irrespective of their fitness effect. Quantifying the variation in time and across genomes of its  
8 intensity is key to properly interpret patterns of molecular evolution. In particular, the existing lit-  
9 erature is unclear regarding the relationship between gBGC strength and species effective population  
10 size,  $N_e$ . Here we analysed the nucleotide substitution pattern in coding sequences of closely related  
11 species of mammals, thus accessing a high resolution map of the intensity of gBGC. Our maximum  
12 likelihood approach shows that gBGC is pervasive, highly variable among species and genes, and of  
13 strength positively correlated with  $N_e$  in mammals. We estimate that gBGC explains up to 60%  
14 of the total amount of synonymous AT→GC substitutions. We show that the fine-scale analysis of  
15 gBGC-induced nucleotide substitutions has the potential to inform on various aspects of molecular  
16 evolution, such as the distribution of fitness effects of mutations and the dynamics of recombination  
17 hotspots.

## 18 1 Introduction

19 GC-biased gene conversion (gBGC) is a recombination-associated transmission bias by which G and C  
20 alleles are favoured over A and T alleles. This evolutionary force was discovered in the 2000's from the  
21 analyses of early population genomic data sets [22, 30, 76, 80], and experimentally confirmed later on [49,  
22 65, 83]. gBGC manifests itself as a GC-bias that affects both non-functional and functional sequences and  
23 is correlated with the local recombination rate [28]. gBGC has a strong impact on patterns of variation  
24 genome wide in mammals [10, 20, 64, 69] and many other taxa [11, 25, 33, 44, 48, 55, 58, 61, 78]. gBGC  
25 can mimic the effect of natural selection and confound its detection by generating patterns of clustered  
26 AT→GC substitutions, distorted site frequency spectra and altered non-synonymous/synonymous ratios  
27 [4, 15, 19, 28, 42, 66, 73]. Importantly, because it favours G and C alleles irrespective of their fitness effect,  
28 gBGC tends to counteract natural selection and increase the deleterious mutation load [3, 32, 41, 59].

29 The abundant body of literature reviewed above demonstrates a significant effect of gBGC in a large  
30 number of genomes. Only a few studies, however, have attempted to quantify its strength - a harder  
31 task. gBGC results from a DNA repair bias involving paired chromosomes at meiosis, and operating  
32 in the immediate neighborhood of DNA double strand breaks. The genome average transmission bias,  
33  $b$ , is therefore expected to be proportional to the recombination rate, gene conversion tract length, and  
34 repair bias. The effect of gBGC on genome evolution is also expected to be dependent on the intensity  
35 of drift: being a directional force, gBGC is only effective if stronger than the stochastic component of  
36 allele frequency evolution. The intensity of drift is inversely related to the effective population size  $N_e$ ,  
37 so that the strength of gBGC is usually measured by the  $B = 4N_e b$  parameter. Glémin et al. [35] used  
38 genome-wide resequencing data to estimate  $B$  at the megabase scale throughout the human genome.

39 Fitting various population genetic models to polarised GC vs. AT site frequency spectra, Glémin et al.  
40 [35] estimated the genome average  $B$  to be in the weak selection range, around 0.4, with  $B$  reaching  
41 a value above 5 in 1%-2% of the genome. This variance among genomic regions in gBGC strength is  
42 interpreted as reflecting the existence of recombination hotspots in humans [8, 20, 76].

43 Similar analyses have been performed in a number of non-human taxa. In the fruit fly *Drosophila*  
44 *melanogaster*, no evidence for gBGC has been reported, albeit a weak effect on the X chromosome  
45 [31, 68]. In contrast, Wallberg et al. [78] estimated the genome average  $B$  to be above 5 in the honey bee  
46 *Apis mellifera*, again with substantial variation between low-recombining and high-recombining regions.  
47 Note that  $N_e$  is expected to be much smaller in *Homo sapiens* and the eusocial *A. mellifera* than in *D.*  
48 *melanogaster* [72]. Galtier et al. [33] analysed site frequency spectrum at synonymous positions in the  
49 coding sequences of 30 species of animals. They estimated that the average  $B$  at third codon positions  
50 varies between 0 and 2 among species, without any significant relationship with  $N_e$ -related life history  
51 traits. These comparisons among distantly-related animals revealed substantial variation in the intensity  
52 of gBGC among species, but, somewhat paradoxically, no detectable effect of  $N_e$ .

53 Another attempt to quantify the strength of gBGC is to get information from between-species diver-  
54 gence data, instead of within-species polymorphism data. Capra et al. [8] simultaneously modelled the  
55 effects of purifying selection and gBGC during the human/chimpanzee divergence and estimated that in  
56 apes 0.33% of the genome is undergoing gBGC at rate  $B = 3$ . This is lower than the estimates provided  
57 by Glémin et al. [35, see above], presumably because Capra et al. [8] assumed a constant gBGC rate at  
58 any location of the genome, whereas recombination hotspots are known to be highly dynamic in apes  
59 [1, 46]. Using a method that combines polymorphism and divergence data, De Maio et al. [18] estimated  
60 the average  $B$  to be of the order of 0.3-0.7 in apes, consistent with Glémin et al. [35]. Lartillot [43] anal-  
61 ysed coding sequence divergence in 33 species of placental mammals and estimated the among-gene and  
62 among-species variation of  $B$ . He found that the average  $B$  varied among species from  $\sim 0.1$  (in apes) to  
63 3-5 (in bats and lagomorphs), with an among-gene standard deviation of  $B$  as high as twice the mean.  
64 Lartillot [43] detected a significant, negative correlation between  $B$  and species body mass. Body mass  
65 being strongly and negatively correlated with population density in mammals [16], this result suggests  
66 that  $N_e$  might be a determinant of the strength of gBGC in mammals, in agreement with theoretical  
67 expectations. Elaborating on the approach of De Maio et al. [18], Borges et al. [5] also reported a positive  
68 relationship between the population scaled gBGC coefficient and  $N_e$  across species/populations of apes.

69 So on one hand comparative analyses of site-frequency spectra among animals did not reveal any  
70 effect of  $N_e$  on the strength of gBGC, while on the other hand the analysis of the substitution pattern  
71 in mammals is consistent with a  $N_e$  effect. Also a bit surprisingly, the estimated range of variation of  $B$   
72 across mammals [0.1-5, 43] is wide enough to contain all the estimates of  $B$  reported in any species of  
73 animals so far. Lartillot [43] analysed a subset of currently annotated mammalian orthologs (1329 exons  
74 in the largest data set), and importantly, relatively ancient divergences, at the family or order level,  
75 thus capturing the average effect of gBGC across dozens of million years. Here we analyse a large set  
76 of genes from closely related species in four families of mammals, thus accessing a high-resolution map  
77 of the effect of gBGC on coding sequences, both in time and across the genome. We focus on two key  
78 features of gBGC-driven molecular evolution, namely clustered AT $\rightarrow$ GC substitutions, and an excess of  
79 AT $\rightarrow$ GC over GC $\rightarrow$ AT substitutions compared to the mutation process. Estimating  $B$  in 40 lineages  
80 of mammals, we show that gBGC explains a substantial fraction of synonymous and non-synonymous  
81 AT $\rightarrow$ GC substitutions, that  $N_e$  is a strong predictor of the intensity of gBGC in mammals, and that  
82 large- $N_e$  and small- $N_e$  taxa differ substantially in how gBGC is distributed among and within genes.

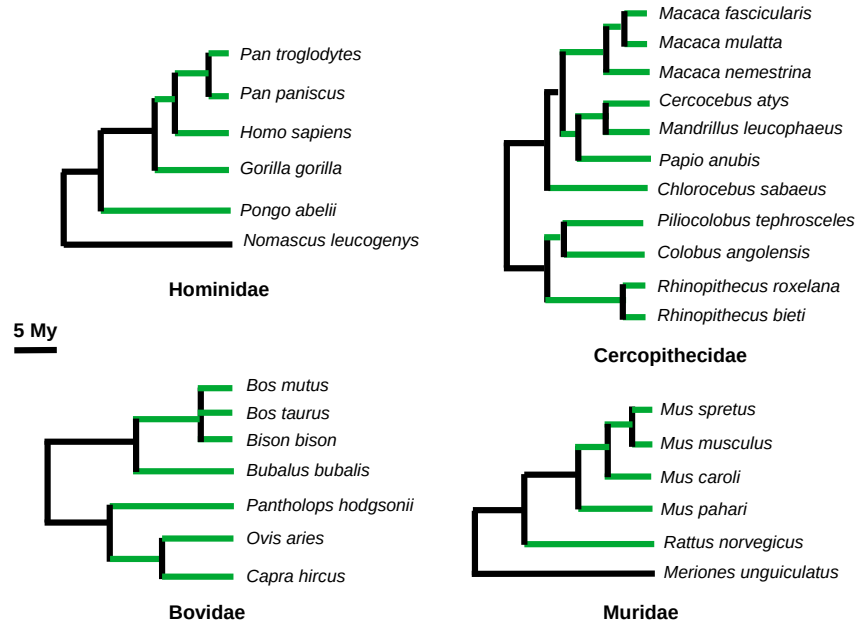

Figure 1: The four families, 32 species and 40 lineages of mammals (green branches) analysed here. Branch lengths are proportional to the estimated divergence time.

## 2 Results

### 2.1 Overview

We analysed patterns of AT→GC (i.e., Weak to Strong, or WS), GC→AT (SW) and GC-conservative (SSWW) coding sequence nucleotide substitutions in 40 recently diverged lineages (branches) from four families of mammals (Fig.1), namely Hominidae (humans and apes), Cercopithecidae (old world monkeys), Bovidae (cattle, sheep and allies) and Muridae (mice, rats, gerbils). A total of 1,104,917 third codon position synonymous substitutions and 514,552 first or second codon position non-synonymous substitutions were called. The median number of substitutions across branches was 24,960, and the minimum was 3927. The overall ratio of non-synonymous to synonymous substitutions,  $d_N/d_S$ , was 0.233; the family-specific  $d_N/d_S$  ratio was 0.275, 0.252, 0.228 and 0.213 in Hominidae, Cercopithecidae, Bovidae and Muridae, respectively. The  $d_N/d_S$  ratio is a marker of  $N_e$  in mammals, with small populations experiencing a higher substitution load, hence a higher  $d_N/d_S$  [60, 62, 70]. These results therefore indicate that the four families of our data set rank in the Hominidae < Cercopithecidae < Bovidae < Muridae order as far as  $N_e$  is concerned, consistent with previous analyses [43, 71].

### 2.2 Substitution clustering

Focusing on synonymous substitutions, we calculated Moran's  $I$  [53], a statistics that measures spatial autocorrelation and was adjusted to target the 400 bp scale. This index therefore measures the tendency for substitutions (of a specific sort) having appeared in a given branch to be located less than 400 bp apart. Fig.2 shows the distribution among branches of the average centered Moran's  $I$ , separately for WS and SW synonymous substitutions. The centered Moran's  $I$  for SW substitutions was very close to zero in all branches from all four families, indicating very little, if any, clustering of substitutions. WS substitutions behaved differently: the centered Moran's  $I$  was close to zero in Hominidae, perceptibly positive in Cercopithecidae, and reached much higher values in Bovidae and Muridae, demonstrating the

106 existence of clusters of synonymous WS substitutions in these two families. This pattern - clustering of  
107 WS but not SW substitutions - is a signature of gBGC [*e.g.* 19]; its intensity appears to increase with  
108  $N_e$  across the four families analysed here.

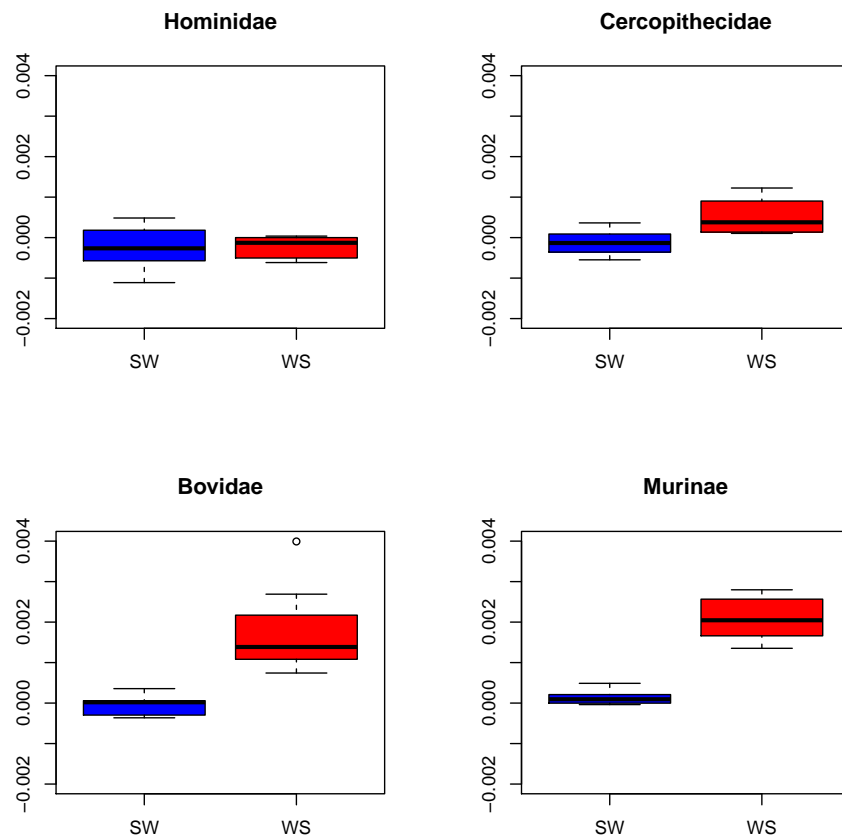

Figure 2: Distribution of centered Moran's  $I$  for WS and SW synonymous substitutions in four families of mammals. Only branches in which at least 100 genes had at least 3 inferred substitutions were included.

109 Simulations were performed in order to assess the amount of clustering needed to explain the observed  
110 values of Moran's  $I$ . Our simulation procedure considers two levels of clustering, one at the 500 bp scale  
111 and one at the 40 bp scale, while accounting for the intron-exon structure and the among-genes variance  
112 in mutation rate and GC-content (see Methods). In Muridae and Bovidae, we were able to replicate  
113 the observed values of Moran's  $I$  when 15-40% of the simulated substitutions appeared in clusters. This  
114 percentage was 0-10% in Cercopithecidae, and non-existent in Hominidae (Supplementary Fig. S1).

### 115 2.3 Estimating $B$

116 For each branch we estimated the population gBGC coefficient  $B = 4N_e b$  and its variation based on  
117 synonymous WS, SW and SSWW synonymous substitution counts. Various models were fitted to the  
118 data via the maximum likelihood (ML) method, assuming that the mutation process is known [75].  
119 Model M1 assumes a constant intensity of gBGC,  $B$ , among and within genes. Model M2 considers two  
120 categories of genes, each with its own gBGC intensity, assumed to be shared by all sites within a gene.  
121 M2 led to a rejection of M1 by a likelihood ratio test ( $p$ -val < 0.05) in 36 branches out of 40. The M3z  
122 model assumes three categories of genes, which we below denote "cold" ( $B = 0$ ), "mild", and "hot".

123 M3z rejected M1 in 39 branches out of 40, and M2 in 27 branches. There was, therefore, strong evidence  
124 for a variable  $B$  across genes in this data set.

125 Then we fitted models that assume some variation of  $B$  both among and within genes. Model M3h  
126 considers three categories of genes that differ in terms of the prevalence,  $q$ , of gBGC hotspots. gBGC is  
127 assumed to operate at intensity  $B_h$  within hotspots, and zero outside hotspots. Model M3sh is a simplified  
128 version of M3h obtained when  $q$  approaches zero. Applying these two models led to a dramatic increase  
129 in log-likelihood for most branches (Supplementary Table S1), which is indicative of the existence of  
130 substantial within-gene variation in gBGC intensity. Model M3h rejected M3sh by a likelihood ratio  
131 test only in one branch out of 40 (*Bison bison* terminal branch, Bovidae), consistent with the idea that  
132 gBGC hotspots occupy a small fraction of coding sequence length.

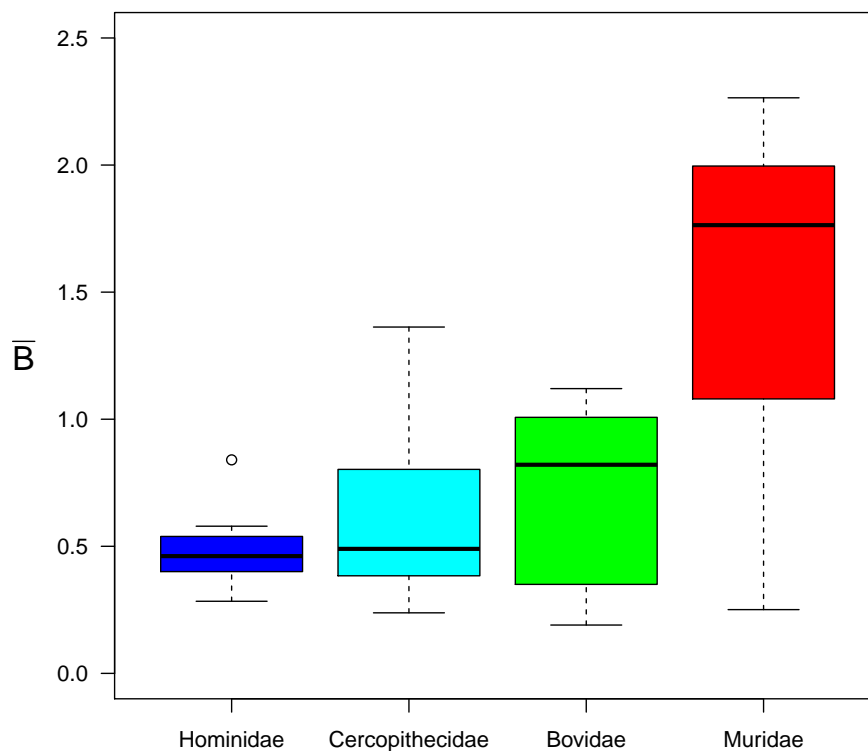

Figure 3: Distribution of the average estimated  $B$  (M3sh model). One outlying data point is missing from the figure: the estimated average  $B$  was 3.86 in the (*Capra hircus*, *Ovis aries*) ancestral branch (Bovidae).

133 The across-genes average gBGC intensity,  $\bar{B}$ , varied among models, with models allowing for more  
134 variation in  $B$  usually yielding a higher  $\bar{B}$  (Supplementary Table S1). Below we report estimates of  $\bar{B}$   
135 obtained under the M3sh model. These were very similar to estimates obtained by averaging  $\bar{B}$  across  
136 the M1, M2, M3z, M3sh and M3h models, weighting by the AIC of each model [63, Supplementary Fig.  
137 S2].

138 Fig.3 shows the distribution of  $\bar{B}$  among branches in the four analysed families. The median  $\bar{B}$  was  
139 just below 0.5 in primates, 0.82 in Bovidae and 1.76 in Muridae. We calculated the across genes relative  
140 standard deviation (RSD) of  $B$ , which is the ratio of the standard deviation by the average  $B$ . The RSD

141 would be expected to be constant across branches if the across-genes distribution of the intensity of gBGC  
142 only differed among branches by a coefficient of proportionality. We found that the RSD was generally  
143 rather high (median RSD across branches: 1.8), and substantially smaller in Muridae (median: 1.2) than  
144 in the other three families (median Bovidae: 1.8; median Hominidae: 1.7; median Cercopithecidae: 2.1).  
145 This suggests that the intensity of gBGC is more evenly distributed among genes in Muridae than in  
146 the other taxa. Of note, this result superficially appears to contradict the analysis illustrated by Fig.2,  
147 which shows that the clustering of WS substitutions is maximal in Muridae. Importantly, the Moran's  
148  $I$  analysis (Fig.2) addresses the within-gene clustering of substitutions, whereas in the RSD analysis we  
149 consider the among-gene variation in gBGC intensity.

150 We estimated in each branch the number of WS substitutions that would be expected in the absence  
151 of gBGC. This was achieved by forcing  $B = 0$  for all categories of genes under the M3sh model (see  
152 Methods). We found that gBGC results in a substantial excess of WS substitutions, which varies from  
153 typically 30% in primates to typically 60% in Muridae (Supplementary Fig. S3). No effect of gBGC on  
154 SW substitutions is expected under the M3sh model (see Methods).

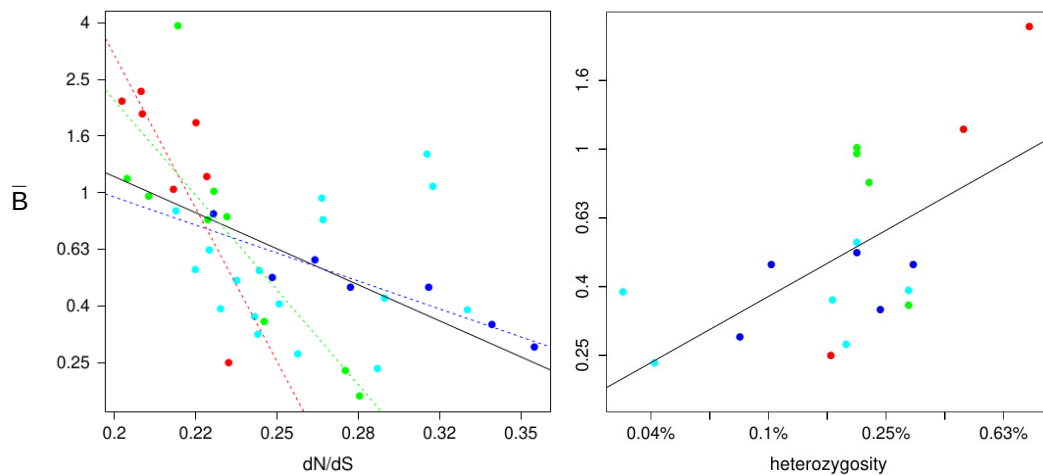

Figure 4: Relationship between the average estimated  $B$  and  $dN/dS$  (left panel,  $n = 40$  branches) or heterozygosity (right panel,  $n = 18$  species) across 40 mammalian lineages in log-transformed scales.  $B$  was estimated under the M3sh model. Blue: Hominidae; cyan: Cercopithecidae; green: Bovidae; red: Muridae; black line: regression line for the whole data set; colored dotted lines: family-specific regression lines

## 155 2.4 Correlates of $B$

156 We correlated the log-transformed estimated  $\bar{B}$  with log-transformed branch-specific  $d_N/d_S$  ratio and  
157 found a significantly negative relationship ( $n = 40$ ;  $r^2 = 0.24$ ; p-val=0.0013). The correlation coefficient of the  $\bar{B}$  vs.  $d_N/d_S$  relationship was also significantly negative when calculated within Hominidae  
158 ( $n = 7$ ;  $r^2 = 0.83$ ; p-val=0.0043), within Bovidae ( $n = 9$ ;  $r^2 = 0.79$ ; p-val=0.0013) and within Muridae  
159 ( $n = 7$ ;  $r^2 = 0.57$ ; p-val=0.049). No significant relationship was detected within Cercopithecidae  
160 (fig.4, left). Very similar results were obtained when we correlated the estimated  $\bar{B}$  with  $d_N/d_S$  calcu-  
161 lated based on SSWW substitutions only, i.e., a statistics essentially independent of gBGC: the squared  
162

163 correlation coefficients were 0.82 (p-val=0.0047), 0.68 (p-val=0.0059) and 0.73 (p-val=0.0139) within Ho-  
164 minidae, Bovidae and Muridae, respectively, and 0.23 (p-val=0.0017) for the whole data set (all variables  
165 log-transformed). A literature search yielded estimates of heterozygosity (*i.e.*, within-species genetic di-  
166 versity),  $\pi$ , in 18 species of our data set. The estimated  $\bar{B}$  was positively correlated with  $\pi$  ( $r^2 = 0.73$ ;  
167 p-val= $2.1 \times 10^{-5}$ ; fig.4, right). The sample size was here too small to investigate the within-family rela-  
168 tionships.  $B$  was also found to be negatively correlated with species longevity ( $r^2 = 0.36$ , p-val=0.0026)  
169 and log-transformed body mass ( $r^2 = 0.22$ , p-val=0.017).

## 170 2.5 Substitution clustering conditional on $B$

171 Fig.2 revealed virtually no clustering of WS substitutions in Hominidae, even though the analysis of  
172 substitution counts demonstrated a significant impact of gBGC on coding sequences in this family (Fig.3).  
173 To test whether the spatial distribution of WS substitutions really differs between mammalian families,  
174 we analysed substitution clustering conditional on  $B$ . For each branch, we first fitted to WS, SW and  
175 SSWW substitution counts a gBGC model, M5f, assuming five categories of genes undergoing distinct  
176 gBGC intensities, from  $B = 0$  in the coldest category to  $B = 10$  in the hottest one. We assigned each gene  
177 to one of these gBGC intensity categories, and calculated the average Moran's  $I$  for WS substitutions  
178 separately for the five categories (Fig.5). This was also done using the hotspot version of this five-  
179 category model, M5shf (Supplementary Fig. S4). The size of dots in Fig.5 and Supplementary Fig. S4  
180 reflects the proportions of the five classes of genes in each family, genes from distinct branches being  
181 here merged. We found that the average Moran's  $I$  increased with gBGC intensity, as expected, but  
182 varied strongly among families in every gBGC category, with Muridae consistently showing the highest  
183 average Moran's  $I$ , and Hominidae the lowest, at all gBGC intensities. This result indicates that the  
184 level of clustering of WS substitutions differs across families to an extent that cannot be explained just  
185 by differences in average  $B$ .

## 186 3 Discussion

187 Analysing the substitution pattern in coding sequences across four mammalian families, we checked two  
188 predictions of the gBGC model, namely a clustering of WS substitutions and an excess of WS over SW  
189 substitutions compared to the mutation pattern. Both approaches revealed a conspicuous effect of gBGC  
190 in mammalian coding sequences.

### 191 3.1 Ubiquitous gBGC in mammals

192 Dreszer et al. [19] investigated the substitution pattern in the human genome and showed that clusters  
193 or nearby substitutions tend to be enriched in the WS sort. The effect, although significant, was not  
194 particularly strong: the proportion of WS substitutions in clusters reached 0.55, whereas it was 0.44 on  
195 average (their figure 1A). Analyzing exon evolution in apes, Berglund et al. [3] and Galtier et al. [32]  
196 identified a few dozens of GC-biased exons, out of >10,000 analyzed exons. Here we applied a distinct  
197 but related approach to mammalian coding sequences, and reveal only a weak, if any, tendency for WS  
198 synonymous substitutions to be clustered in Hominidae, consistent with previous research. The trend,  
199 however, was obvious in Cercopithecidae, and strong in Bovidae and Muridae (Fig.2). Our simulations  
200 suggest that >15%, and maybe up to 40%, of WS synonymous substitutions appear as clusters in these  
201 two families. These WS substitution clusters likely reflect a localized effect of gBGC at recombination  
202 hotspots. Here we show that such clusters, although anecdotal in humans and apes, are a major  
203 component of the substitution pattern in other families of mammals.



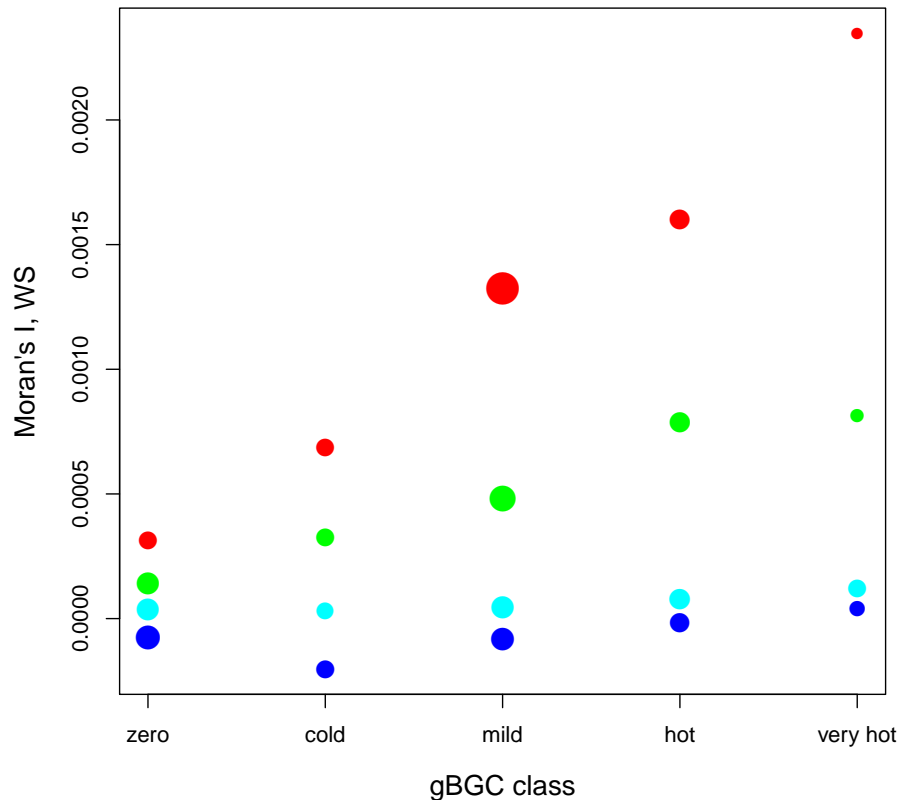

Figure 5: Average centered Moran's  $I$  as a function of average estimated gBGC strength  $B$ . Each dot is for a class of genes in a family (all species merged). Genes were assigned to classes under the M5f model. Dot size reflects the relative number of genes in the considered class. Blue: Hominidae; cyan: Cercopitheciidae; green: Bovidae; red: Muridae.

204 Our estimate of the  $B$  parameter, which measures the average intensity of gBGC across genes, varied  
 205 between 0.2 and 3.9 among the 40 analysed lineages. In primates, the median estimated  $\bar{B}$  was  $\sim 0.5$ ,  
 206 i.e., in the range of previously published values: 0.1 in hominoids [43], 0.38 in humans [35], 0.35-0.7 in  
 207 apes [18]. Our estimates of  $\bar{B}$  in Bovidae ( $\sim 0.5 - 1$ ) and Muridae ( $\sim 1 - 2$ ) are also quite similar to  
 208 those obtained by Lartillot [43] in the *Bos taurus* (Bovidae), *Mus musculus* and *Rattus rattus* (Muridae)  
 209 lineages. In Bovidae, we found a positive relationship between the estimated  $\bar{B}$  and branch age (in  
 210 million years), defined as the average between the date of the top and bottom nodes of a branch ( $n = 9$   
 211 branches;  $r^2 = 0.75$ ; p-val=0.003). This is consistent with the hypothesis of a high ancestral  $N_e$  in this  
 212 taxon, as also suggested by fossil data and  $d_N/d_S$ -based reconstructions [26, 27]. Our study could not  
 213 confirm the report by Romiguier et al. [69] and Lartillot [43] of a particularly strong gBGC in bats,  
 214 tenrecs and lagomorphs due to the unavailability of fully-sequenced, closely related species in sufficient  
 215 numbers in these taxa.

216 The estimated genome average  $B$  was in the nearly neutral zone in the four families analysed here.  
 217 Even so, gBGC was found to be pervasive and strongly impact the substitution process in coding se-  
 218 quences. Fitting a three-category, hotspot model across genes, we estimate that 30 to 60% of the WS  
 219 synonymous substitutions can be attributed to gBGC in mammals. It should be noted that this estimate,  
 220 as well as the estimates of  $B$  we report in this work, is dependent on the assumption of a known and



221 constant mutation process. Here we used the WS, SW, SS and WW mutations rates obtained from Smith  
222 et al. [75], who analysed >130,000 *de novo* mutations inferred from mother/father/child trios in humans  
223 - a very large data set. Milholland et al. [52] compared the germline mutation pattern of *H. sapiens* and  
224 *M. musculus* and did not detect any conspicuous difference between the two species in the proportions  
225 of SW, WS and SSW mutations, and neither did Wang et al. [79] when comparing *Macaca mulatta*  
226 (*Cercopithecidae*) to *H. sapiens*. So the existing literature does not seem to question our assumption of  
227 constant relative mutation rates in mammals - but note that no such data is available in Bovidae, to our  
228 knowledge. Also note that the clustering analysis (Fig.2) does not make any assumption regarding the  
229 mutation process.

230 It should be noted that our estimate of  $B$  in this analysis is based on substitution counts inferred  
231 via a parsimony-based approach. This way of counting substitutions is not devoid of potential problems.  
232 Maximum parsimony substitution inference is known to be biased towards common-to-rare changes  
233 [21]. However, the relatively recent divergence times we are considering presumably keeps this effect to  
234 a minimum. Indeed the longest branch across all four trees (Fig. 1), the *Rattus norvegicus* terminal  
235 branch, has a length below 0.08 substitutions per site, which is the minimal length for which this problem  
236 was detectable in [21]. Using closely related species, on the other hand, runs into another potential bias:  
237 when closely related species are analysed, there is a risk that within-species polymorphism contributes  
238 a non-negligible fraction of the observed sequence variation, biasing the estimation of quantities such as  
239 the  $d_N/d_S$  ratio [56]. This bias likely affects the estimation of the relative SW and WS substitution rates  
240 as well, since the expected SW/WS rate ratio differs between polymorphism and divergence when gBGC  
241 is at work. More work would be needed to confirm and quantify the effect of this bias on our analysis.

### 242 3.2 A significant effect of the effective population size

243 Although a significant effect of gBGC was detected in all four analysed families, its intensity varied  
244 conspicuously among families, Muridae being the most strongly impacted, followed by Bovidae, Cercopithecidae,  
245 and Hominidae. It is noticeable that gBGC ranks family in the same order as  $N_e$ , as measured  
246 by the family-average  $d_N/d_S$  ratio, this order being consistently recovered in nearly all the analyses we  
247 performed. This is in line with the expectation that the intensity of gBGC should be higher in large than  
248 in small populations. An effect of  $N_e$  was also detected by correlating  $\bar{B}$  with the  $d_N/d_S$  ratio across  
249 branches, and with heterozygosity across species (Fig.4). These analyses confirmed the significance of  
250 the effect, both among and within families, thus corroborating the relationship uncovered by Lartillot  
251 [43] at a deeper phylogenetic scale.

252 Interestingly, the slope of the  $\log(\bar{B})$  vs.  $\log(d_N/d_S)$  relationship differed conspicuously among fam-  
253 ilies in Fig.4. This result might tell something about the strength of selection on amino-acid changing  
254 mutations in mammalian coding sequences. Welch et al. [81] showed that, assuming a Gamma distribu-  
255 tion of deleterious effects of non-synonymous mutations, the  $d_N/d_S$  ratio is expected to be proportional  
256 to  $N_e^{-\beta}$ , where  $\beta$  is the shape parameter of the Gamma distribution. So under this assumption, and since  
257  $B$  is proportional to  $N_e$ , the slope of the  $\log(\bar{B})$  vs.  $\log(d_N/d_S)$  relationship should equal  $-1/\beta$ . This  
258 rationale yields estimates of  $\beta$  equal to 0.51 in Hominidae, 0.15 in Bovidae, and 0.09 in Muridae. These  
259 figures differ considerably from estimates obtained by site frequency spectrum analyses, *i.e.*,  $\beta \sim 0.15$  in  
260 Hominidae and  $\sim 0.2$  in Muridae [9, 29, 38]. More work is needed to understand the origin and meaning  
261 of this discrepancy. At any rate, our results suggest that gBGC analysis could constitute a new source  
262 of information on the variation in  $N_e$  among species, and might enrich the ongoing discussion on this  
263 issue [e.g 7, 29].

264 The among lineages correlation between the estimated  $\bar{B}$  and the  $d_N/d_S$  ratio we report here in  
265 mammals, which confirms Lartillot [43]'s results, contrasts with the absence of such a correlation at

266 the Metazoa scale. Large- $N_e$  fruit flies and marine molluscs, for instance, are less strongly impacted  
267 by gBGC than small- $N_e$  bees and amniotes [33, 68, 78]. The simplest explanation for this is that  
268  $b$ , the transmission bias, probably differs much between distantly related taxa, due to differences in  
269 recombination rate, repair bias and/or conversion tract length. For instance, the recombination rate is  
270 known to be particularly high in honey bees [82].

271 Two recent studies experimentally assessed the intensity of gBGC in mice via crosses followed by  
272 sperm [34] or progeny [47] whole genome sequencing. Both estimated that  $b$  is lower in mice than  
273 in humans - maybe five times lower, although this figure requires confirmation. Gautier [34] invoked  
274 purifying selection against gBGC to explain this result. Indeed, because of its deleterious effects [3, 32,  
275 59], gBGC as a process could be counter-selected, and purifying selection being more effective in large  
276 than in small population, this verbal model would predict a lower  $b$  in mice than in human. Adapted  
277 to our results, this hypothesis of a negative correlation between  $N_e$  and  $b$  would imply that the range  
278 of variation in  $B$  should be narrower than the range of variation in  $N_e$  among mammalian lineages.  
279 We indeed observed a narrower variation in the magnitude of the estimated  $\bar{B}$  (standard deviation of  
280  $\log(\bar{B})$ : 0.63) than of heterozygosity (standard deviation of  $\log(\pi)$ : 0.74; same 18 species used in these  
281 two calculations, see Fig.4, right panel). The difference, however, is not particularly pronounced, and  
282 does not suggest the existence of a strong negative relationship between  $b$  and  $N_e$  in mammals. That  
283 said, not only  $N_e$  influences the variation of  $\pi$ : the mutation rate also matters. Among-species differences  
284 in per generation mutation rate, if any, should be taken into account for a better assessment of the  $b$  vs.  
285  $N_e$  relationship.

### 286 3.3 Recombination hotspots dynamics

287 The among-gene variation in gBGC intensity, measured by the relative standard deviation of  $B$ , was  
288 found to be substantial in all branches, while lower in Muridae than in the other three families - a  
289 pattern also reported by Lartillot [43]. gBGC seems to be more evenly distributed across the genome  
290 in this taxon, consistent with previous reports that GC3 in murid rodents has been increasing and was  
291 homogenised since the common ancestor of this family [10, 54, 67, 69]. Muridae appears to be a peculiar  
292 group of mammals with this respect [69], and one should keep this in mind when interpreting patterns  
293 of gBGC-related evolution in this taxon. Of note, the existing literature does not suggest that the  
294 recombination map is less heterogeneous in mouse or rat than in primates [6, 40, 50].

295 The within-gene heterogeneity in  $B$ , in contrast, was more pronounced in Muridae than in Bovidae  
296 and, particularly, primates (Fig.2), and this was true even when we controlled for gene-specific  $B$  (Fig.5):  
297 for any particular intensity of gBGC, WS substitutions tend to be more clustered in large- $N_e$  than in  
298 small- $N_e$  species. This intriguing result might be interpreted in relation with the dynamics of recom-  
299 bination hotspots. To result in a cluster of WS substitutions, a recombination hotspot must be active  
300 during a sufficiently long period of time for several WS alleles to reach a high population frequency. We  
301 suggest that in primates gBGC does not generate a pattern of highly clustered WS substitutions because  
302 heterozygosity is low and recombination hotspots are short-lived in this taxon. Indeed, recombination  
303 hotspots are known to be particularly ephemeral in Hominidae, due to a transmission distortion asso-  
304 ciated with the Red Queen-like evolution of the major hotspot determining gene PRDM9 [1, 14, 57].  
305 For instance, Lesecque et al. [46] showed that denisovians and modern humans did not share the same  
306 recombination hotspots, while the level of divergence between these two genomes is of the order of one  
307 synonymous substitution per gene on average [51]. Our results might suggest that the situation differs  
308 in other taxa of mammals, maybe in a way related to  $N_e$ . At any rate, heterozygosity is higher in  
309 large- $N_e$  species, which increases the probability that a given local episode of gBGC results in more than  
310 one WS substitutions, irrespective of recombination hotspot lifespan. A deeper understanding of this

311 result would require to account for the many factors influencing the turnover time of PRDM9 alleles and  
312 recombination hotspots [45], the length of gene conversion tracts, as well as the population mutation  
313 rate and fixation probability of WS mutations.

## 314 4 Concluding remarks

315 Quantifying gBGC in closely related species of mammals, we report a pervasive effect on the nucleotide  
316 substitution process, a positive relationship with  $N_e$ , and a complex pattern of variation within and  
317 among genes. This work also demonstrates that the analysis of gBGC has the potential to illuminate  
318 various aspects of molecular evolution, including the distribution of fitness effect of mutations and the  
319 dynamics of recombination hotspots. The apparent lack of a  $N_e$  effect on gBGC intensity at the Metazoa  
320 scale is an unresolved question that requires further quantification of the strength of gBGC in non-  
321 vertebrate taxa.

## 322 5 Material and Methods

### 323 5.1 Sequence data

324 Mammalian coding sequence alignments were downloaded from the Orthomam v10 database [74]. The  
325 four families of mammals represented by at least six species in OrthoMam v10 were selected, namely  
326 Hominidae (six species, 11,859 genes), Cercopithecidae (eleven species, 10,834 genes), Bovidae (seven  
327 species, 9527 genes), and Muridae (six species, 11,758 genes). In Bovidae, the *Bos indicus* sequences  
328 were not considered since this taxon is a subspecies of *Bos taurus*. In all four families the phylogenetic  
329 histories of the sampled species are well documented, with the exception of the unresolved relationship  
330 between cattle, yak and bison [23, 24, 37, 77, Fig1]. Nodes were dated based on the TimeTree website  
331 (<http://www.timetree.org/>) using the median date estimates.

### 332 5.2 Substitution mapping

333 For each of the four data sets, nucleotide substitutions were mapped to the resolved branches of the trees  
334 using a stringent parsimony approach. For any given branch, an X→Y substitution was recorded if and  
335 only if all species descending from the considered branch carried state Y, and all other species carried  
336 state X. All positions not matching this exact pattern, including positions with missing data or gaps,  
337 were disregarded. Branches connected to the root of the tree were excluded, as well as branches whose  
338 number of descending species was higher than half the total number of sampled species in the family. A  
339 total of 40 distinct branches were considered - seven in Hominidae and Muridae, nine in Bovidae, 17 in  
340 Cercopithecidae (Fig.1). For each branch and each coding sequence, the number and positions of non-  
341 synonymous and synonymous substitutions were recorded, distinguishing the AT→GC (WS), GC→AT  
342 (SW) and GC-conservative (SSWW) sorts. Only synonymous substitutions occurring at third codon  
343 positions, and non-synonymous substitutions occurring at first or second codon positions, were counted.  
344 For any given branch, substitutions that mapped to consecutive sites were ignored, and genes in which  
345 the per base pair substitution rate was higher than ten times the across-genes median rate were discarded  
346 (implying that the number of analysed genes could slightly differ among lineages within a family). The  
347 last two steps aimed at diminishing the effect of misaligned regions.

### 348 5.3 Clustering analysis (synonymous substitutions)

349 For each branch and each gene of length above 400 bp, we calculated Moran's  $I$  index (Moran 1950)  
350 separately for WS and SW synonymous substitutions. We used a weight matrix defined as follows: the  
351 weight equalled one for any two substitutions distant of 400 bp or less, and zero for any two substitutions  
352 more distant than 400 bp. Window widths of 200 bp and 100 bp gave qualitatively similar results. For  
353 each branch and each sort of substitutions, Moran's  $I$  was averaged across genes, excluding genes with  
354 less than three substitutions of the considered sort. Moran's  $I$  has a negative expectation of  $-1/(l-1)$   
355 under the null hypothesis of no spatial autocorrelation, where  $l$  is the number of third codon positions  
356 of the considered gene. Here we used the centered version of the statistics,  $I + 1/(l-1)$ , the expectation  
357 of which is zero in the absence of substitution clustering.

### 358 5.4 Clustering: simulations

359 We downloaded from the Ensembl database coding sequence annotations in one representative species  
360 per family, namely *Homo sapiens* (Hominidae), *Macaca mulatta* (Cercopithecidae), *Bos taurus* (Bovidae)  
361 and *Mus musculus* (Muridae), disregarding coding sequences shorter than 400 bp. Then we simulated  
362 substitution data in a hypothetical branch by iteratively sampling the location of third-codon-position  
363 substitutions across coding sequences using the following method:

364 (initiation:) randomly sample the location of the first substitution among the third codon positions of  
365 all genes;

366 (iteration:)

367 - with probability  $1 - p_{clust}$ , randomly sample the location of the  $(n+1)^{th}$  substitution among the third  
368 codon positions of all genes;

369 - with probability  $p_{clust}$ , randomly sample the location of the  $(n+1)^{th}$  substitution in the neighborhood  
370 of the  $n^{th}$  substitution (clustered substitutions).

371 More precisely, conditional on the  $n^{th}$  and  $(n+1)^{th}$  substitutions being clustered,

372 - with probability  $p_{CO}$  the  $(n+1)^{th}$  substitution was randomly sampled in a window of width  $l_{CO}$   
373 centered on the location of the  $n^{th}$  substitution, and

374 - with probability  $p_{NCO} = 1 - p_{CO}$  the  $(n+1)^{th}$  substitution was randomly sampled in a window of  
375 width  $l_{NCO}$  centered on the location of the  $n^{th}$  substitution.

376 This was intended to represent the fact that gene conversion tracts associated to crossing-over and non-  
377 crossing-over events are of different lengths [13]. If the sampled location of the  $(n+1)^{th}$  substitution  
378 reached beyond the boundaries of the exon carrying the  $n^{th}$  substitution, then the  $(n+1)^{th}$  substitution  
379 was ignored. Our procedure also accounted for the existence of variation in mutation rate among exons:  
380 we assumed that one half of the exons had a mutation rate  $\gamma$  times as high as the other half. We separately  
381 simulated WS and SW substitution data, accounting for the distribution of GC-content at third codon  
382 positions - hence, the availability of W and S sites - in the four groups. A gene with GC3=90% was 10  
383 times more likely to host a SW substitution than a gene with GC3=10% in our simulations.

384 Two parameters of the simulation procedure were varied among conditions, namely the per third  
385 codon position density of substitutions (taking values in  $\{0.0003, 0.001, 0.003, 0.01, 0.03\}$ ) and the  
386 probability  $p_{clust}$  for two successive substitutions to be clustered (taking values in  $\{0, 0.1, 0.2, 0.3, 0.4\}$ ).  
387 The other parameters were fixed to constant values estimated from the literature. Parameters  $l_{CO}$  and  
388  $l_{NCO}$  were set to 500 and 40 bp, respectively [13, 39, 47, 83]. Parameter  $\gamma$  was set to 3, ensuring an  
389 among-exon mutation rate relative standard deviation of 0.5, in agreement with figure 4 in Smith et al.  
390 [75]. Finally, parameter  $p_{CO}$  was set to 0.86, according to the following rationale: the CO/NCO odds  
391 ratio for the first substitution to occur in a gene conversion tracts is  $(l_{CONCO})/(l_{NCONCO})$ , where  $n_{CO}$   
392 and  $n_{NCO}$  are the number of crossing-over and non crossing-over events, respectively; the CO/NCO

393 odds ratio for the second substitution to occur in the same gene conversion tract is  $l_{CO}/l_{NCO}$ ; so the  
 394 CO/NCO odds ratio for the occurrence of a pair of clustered substitutions is the product,  $p$ , of the two  
 395 terms above, and  $p_{CO} = p/(1+p)$ . Using  $n_{CO}/n_{NCO} = 0.1$  [2, 12],  $l_{CO} = 500$  and  $l_{NCO} = 40$  we obtain  
 396  $p_{CO} = 0.86$ .

## 397 5.5 Maximum likelihood estimation of gBGC strength

398 For each branch and each gene, we counted the numbers of inferred WS, SW and SSWW synonymous  
 399 substitutions at third codon positions. Then we fitted mutation/gBGC/drift models to these observations  
 400 in the maximum likelihood framework.

401 Consider a coding sequence of length  $l$  evolving in a panmictic diploid population of constant size  $N_e$   
 402 under neutrality during a period  $T$  of time. The expected number of substitutions,  $n^*$ , depends on the  
 403 mutation rate  $\mu$  and fixation probability  $f$ :

$$n^* = 2N_e l \mu f T \quad (1)$$

404 Assuming a homogeneous gBGC intensity of  $b$ , the fixation probability of WS, SW and SSWW  
 405 mutations can be written as:

$$f_1 = \frac{2b}{1 - e^{-4N_e b}} \quad (2)$$

$$f_2 = \frac{2b}{e^{4N_e b} - 1} \quad (3)$$

$$f_3 = 1/2N_e \quad (4)$$

406 Here and below, subscript 1, 2 and 3 respectively refer to the WS, SW and SSWW sorts of change.  
 407 Substituting in equation 1 and only considering third codon positions, we get the expected number of  
 408 synonymous substitutions of the three sorts:

$$n_1^* = l_W \mu_{WS} \frac{B}{1 - e^{-B}} T \quad (5)$$

$$n_2^* = l_S \mu_{SW} \frac{B}{e^{-B} - 1} T \quad (6)$$

$$n_3^* = (l_W \mu_{WW} + l_S \mu_{SS}) T \quad (7)$$

409 where  $B = 4N_e b$ ,  $l_W$  and  $l_S$  are the number of AT- and GC-ending codons, respectively, in the  
 410 considered coding sequence, and  $\mu_{WS}$ ,  $\mu_{SW}$ ,  $\mu_{SS}$  and  $\mu_{WW}$  are the corresponding mutation rates.

411 Assuming that the number of WS substitutions is Poisson distributed, the probability of observing  
 412  $n$  WS substitutions given  $B$  and  $T$  is given by the following function:

$$\phi_1(n|B, T) = \frac{n_1^{*n}}{n!} e^{-n_1^*} \quad (8)$$

413 and similarly for SW and SSWW substitutions:

$$\phi_2(n|B, T) = \frac{n_2^{*n}}{n!} e^{-n_2^*} \quad (9)$$

$$\phi_3(n|B, T) = \frac{n_3^{*n}}{n!} e^{-n_3^*} \quad (10)$$

414 We modelled the variation of  $B$  among genes using discrete distributions. Assume there are  $k$  cate-  
 415 gories of genes, with each category including a fraction  $p_k$  of the genes and characterised by a population-  
 416 scaled gBGC intensity  $B_k$ , assumed to be constant within genes. For a gene at which  $n_1$ ,  $n_2$ , and  $n_3$   
 417 substitutions of the three sorts are observed, the likelihood can be written as:

$$L = \sum_k p_k \phi_1(n_1|B_k, T) \phi_2(n_2|B_k, T) \phi_3(n_3|B_k, T) \quad (11)$$

418 We considered various models that differ in how  $B$  varies across genes. Under model M1, a constant  
 419  $B$  across genes is assumed. Model M2 defines two categories of genes, each with its own gBGC intensity.  
 420 Model M3z (for zero) has three categories of genes, among which one has a gBGC intensity of zero, the  
 421 other two being free parameters. Model M5f (for fixed) has five categories of genes with fixed gBGC  
 422 intensities equal to  $B_1 = 0$ ,  $B_2 = 0.333$ ,  $B_3 = 1$ ,  $B_4 = 3.333$  and  $B_5 = 10$ , respectively. In all four  
 423 models the proportions of genes in the various categories were free to vary,  $T$  was assumed to be shared  
 424 among genes and the relative mutation rates  $\mu_{WS}$ ,  $\mu_{SW}$ ,  $\mu_{SS}$  and  $\mu_{WW}$  were set to empirical estimates  
 425 obtained from Smith et al. (2018), i.e.,  $\mu_{WS} = 5.21$ ,  $\mu_{SW} = 10.90$ ,  $\mu_{SS} = 2.07$  and  $\mu_{WW} = 1$ .

426 The models above assume a homogeneous rate of gBGC among positions within a gene. To account  
 427 for the existence of hotspots of gBGC, we modelled the within-gene variation of  $B$  by assuming that only  
 428 a fraction  $q$  of the positions undergo gBGC at rate  $B_h$ , the other positions evolving neutrally. Under  
 429 this assumption, the expected number of WS and SW substitutions are given by:

$$n_1^* = l_W \mu_{WS} \left[ (1 - q) + \frac{q B_h}{1 - e^{-B_h}} \right] T \quad (12)$$

$$n_2^* = l_S \mu_{SW} \left[ (1 - q) + \frac{q B_h}{e^{B_h} - 1} \right] T \quad (13)$$

430 while  $n_3^*$  is given by equation 7.

431 Equations 12 and 13 simplify if  $q$  is assumed to be much smaller than 1 and  $B_h$  much higher than 1;  
 432 under these assumptions, we have:

$$n_1^* = l_W \mu_{WS} (1 + q B_h) T \quad (14)$$

$$n_2^* = l_S \mu_{SW} T \quad (15)$$

433 Parameters  $q$  and  $B_h$  only appear as a product in equations 14 and 15, saving one degree of free-  
 434 dom. The simplified equation 15 exhibits the main difference between hotspot and gene-homogeneous  
 435 models, which concerns SW substitutions. In gene-homogeneous models, the expected number of SW  
 436 substitutions is decreased in genes experiencing strong gBGC, whereas hotspot models predict nearly no  
 437 influence of gBGC on the SW substitution rate if  $q$  is sufficiently small.

438 The among-gene variation in gBGC strength was here modeled via categories of genes that differed  
 439 with respect to the prevalence of hotspots,  $q$ , while sharing the same intensity of gBGC within hotspots,  
 440  $B_h$ . Specifically, we considered a three-category model in which the "coldest" category had no hotspot,  
 441 i.e.,  $q_1 = 0$ . The fraction of hotspots in the other two categories,  $q_2$  and  $q_3$ , and the relative prevalence  
 442 of the three categories,  $p_1$ ,  $p_2$  and  $p_3$ , as well as  $T$  and  $B_h$ , were free to vary. This model was called  
 443 M3h (for hotspot); its predictions are given by equations 12, 13 and 7. A simplified hotspot model,  
 444 M3sh (for simplified hotspot), was also implemented by instead using equations 14, 15 and 7. M3sh is



445 a special case of M3h assuming that the fraction of sites affected by gBGC within a gene is small. We  
 446 also considered a simplified five-category hotspot model, M5shf, with fixed values for the  $q_k B_h$  product  
 447 equal to 0, 0.333, 1, 3.33 and 10, respectively.

448 The overall likelihood was obtained by multiplying the likelihoods of distinct genes. Parameters  
 449 were estimated in the maximum likelihood (ML) framework. Likelihood maximization was achieved via  
 450 home-made C++ programs using the Bio++ library [36].

451 The across gene categories average estimated intensity of gBGC was computed as

$$\bar{B} = \sum_k \hat{p}_k \hat{B}_k \quad (16)$$

452 under gene-homogeneous models and

$$\bar{B} = \sum_k \hat{p}_k \hat{q}_k \hat{B}_h \quad (17)$$

453 under hotspot models, where the  $k$  index is for gene categories and the hat denotes ML estimate.  
 454 The across genes standard deviation of the intensity of gBGC was calculated similarly.

455 Akaike's Information Criterion (AIC) was calculated for all models, the number of estimated param-  
 456 eters being 2, 4, 5, 5, 5 and 6, respectively, for M1, M2, M3z, M5f, M3sh, M5shf and M3h. AIC  
 457 weights [63] were used to calculate an across-model estimate of the  $B$  parameter. The parametrisation  
 458 of the various models is recapitulated in Table 1.

459 For each gene, the expected number of WS substitutions in the absence of gBGC was estimated as:

$$m_1^* = l_W \mu_{WS} \hat{T} \quad (18)$$

460 and the excess WS substitutions due to gBGC were estimated as  $(n_1^* - m_1^*)/m_1^*$ . No depletion of SW  
 461 substitutions is expected under M3sh (compare equations 15 and 18). Finally, each gene was assigned to  
 462 one of the gBGC categories by selecting the category  $k$  maximising the following posterior probability:

$$\phi_1(n_1|B_k, T) \phi_2(n_2|B_k, T) \phi_3(n_3|B_k, T) \quad (19)$$

463 All these calculations were achieved separately for the 40 branches of the data set.

464

| model            | cat. <sup>a</sup> | nb fixed <sup>b</sup> | fixed <sup>c</sup>                       | nb optimised <sup>d</sup> | optimised <sup>e</sup>       |
|------------------|-------------------|-----------------------|------------------------------------------|---------------------------|------------------------------|
| all <sup>f</sup> |                   |                       | $\mu_{WS}, \mu_{SW}, \mu_{SS}, \mu_{WW}$ |                           | $T$                          |
| M1               | 1                 | 4                     |                                          | 2                         | $B$                          |
| M2               | 2                 | 4                     |                                          | 4                         | $B_1, B_2, p_1$              |
| M3z              | 3                 | 5                     | $B_1$                                    | 5                         | $B_2, B_3, p_1, p_2$         |
| M5f              | 5                 | 9                     | $B_1 - B_5$                              | 5                         | $p_1 - p_4$                  |
| M3h              | 3                 | 5                     | $q_1$                                    | 6                         | $q_2, q_3, B_h, p_1, p_2$    |
| M3sh             | 3                 | 5                     | $q_1 B_h$                                | 5                         | $q_2 B_h, q_3 B_h, p_1, p_2$ |
| M5shf            | 5                 | 9                     | $q_1 B_h - q_5 B_h$                      | 5                         | $p_1 - p_4$                  |

Table 1: Parametrisation of the models used in this analysis. *a* : number of categories of genes; *b*: number of fixed parameters; *c*: list of fixed parameters; *d*: number of optimized parameters; *e*: list of optimized parameters; *f*: parameters shared by all models



## 465 5.6 Additional variables

466 For every branch, the numbers of non-synonymous substitutions of the WS, SW and SSWW sorts at first  
467 and second codon positions were computed, summed across genes, and used to calculate branch-specific  
468  $d_N/d_S$  ratios. A literature survey was conducted in search for genome-wide estimates of within-species  
469 diversity, or heterozygosity,  $\pi$ . Such estimates were collected in 18 of the analysed species, as reported  
470 in Supplementary Table S2. Data on species longevity and body mass were obtained from the AnAge  
471 data base [17] and are also reported in Supplementary Table S2.

## 472 6 Supplementary Material, Data accessibility

473 All the data sets, programs and scripts used in this study are available from:

474 [https://osf.io/fx54q/?view\\_only=1109ca2f66e74ad99f0d76ac93d40fc5](https://osf.io/fx54q/?view_only=1109ca2f66e74ad99f0d76ac93d40fc5)

## 475 7 Acknowledgments

476 The author is grateful to Laurent Duret, Nicolas Lartillot, Sylvain Glémin, Benoît Nabholz and Jonathan  
477 Romiguier for very useful comments, and to Adam Eyre-Walker for sharing data on *de novo* mutation  
478 in humans. This work was supported by Agence Nationale de la Recherche project ANR-19-CE12-0019  
479 (HotRec).

## 480 References

- 481 [1] A Auton, A Fledel-Alon, S Pfeifer, O Venn, L Séguérel, T Street, E M Leffler, R Bowden, I Aneas,  
482 J Broxholme, P Humburg, Z Iqbal, G Lunter, J Maller, R D Hernandez, C Melton, A Venkat, M A  
483 Nobrega, R Bontrop, S Myers, P Donnelly, M Przeworski, and G McVean. A fine-scale chimpanzee  
484 genetic map from population sequencing. *Science*, 336(6078):193–198, 2012.
- 485 [2] F Baudat and B de Massy. Regulating double-stranded DNA break repair towards crossover or  
486 non-crossover during mammalian meiosis. *Chromosome Res*, 15(5):565–577, 2007.
- 487 [3] J Berglund, K S Pollard, and M T Webster. Hotspots of biased nucleotide substitutions in human  
488 genes. *PLoS Biol*, 7(1):e26, 2009.
- 489 [4] P Bolívar, C F Mugal, M Rossi, A Nater, M Wang, L Dutoit, and H Ellegren. Biased inference of  
490 selection due to GC-biased gene conversion and the rate of protein evolution in flycatchers when  
491 accounting for it. *Mol Biol Evol*, 35(10):2475–2486, 2018.
- 492 [5] R Borges, G J Szöllösi, and C Kosiol. Quantifying gc-biased gene conversion in great ape genomes  
493 using polymorphism-aware models. *Genetics*, 212(4):1321–1336, 2019.
- 494 [6] H Bruntschwig, L Levi, E Ben-David, R W Williams, B Yakir, and S Shifman. Fine-scale maps of  
495 recombination rates and hotspots in the mouse genome. *Genetics*, 191(3):757–764, 2012.
- 496 [7] V Buffalo. Why do species get a thin slice of  $\pi$ ? Revisiting Lewontin’s paradox of variation. *bioRxiv*,  
497 doi: <https://doi.org/10.1101/2021.02.03.429633>, 2021.
- 498 [8] J A Capra, M J Hubisz, D Kostka, K S Pollard, and A Siepel. A model-based analysis of GC-biased  
499 gene conversion in the human and chimpanzee genomes. *PLoS Genet*, 9(8):e1003684, 2013.

- 500 [9] D Castellano, M C Macià, P Tataru, T Bataillon, and K Munch. Comparison of the full distribution  
501 of fitness effects of new amino acid mutations across great apes. *Genetics*, 213(3):953–966, 2019.
- 502 [10] Y Clément and P F Arndt. Substitution patterns are under different influences in primates and  
503 rodents. *Genome Biol Evol*, 3:236–245, 2011.
- 504 [11] Y Clément, G Sarah, Y Holtz, F Homa, S Pointet, S Contreras, B Nabholz, F Sabot, L Sauné,  
505 M Ardisson, R Bacilieri, G Besnard, A Berger, C Cardi, F De Bellis, O Fouet, C Jourda, B Khadari,  
506 C Lanaud, T Leroy, D Pot, C Sauvage, N Scarcelli, J Tregear, Y Vigouroux, N Yahiaoui, M Ruiz,  
507 S Santoni, J P Labouisse, J L Pham, J David, and S Glémin. Evolutionary forces affecting synony-  
508 mous variations in plant genomes. *PLoS Genet*, 13(5):e1006799, 2017.
- 509 [12] F Cole, L Kauppi, J Lange, I Roig, R Wang, S Keeney, and M Jasin. Homeostatic control of  
510 recombination is implemented progressively in mouse meiosis. *Nat Cell Biol*, 14(4):424–430, 2012.
- 511 [13] F Cole, F Baudat, C Grey, S Keeney, B de Massy, and M Jasin. Mouse tetrad analysis provides  
512 insights into recombination mechanisms and hotspot evolutionary dynamics. *Nat Genet*, 46(10):  
513 1072–1080, 2014.
- 514 [14] G Coop and S R Myers. Live hot, die young: transmission distortion in recombination hotspots.  
515 *PLoS Genet*, 3(3):e35, 2007.
- 516 [15] P Corcoran, T I Gossman, HJ Barton, Great-Tit-HapMap-Consortium, J Slate, and K Zeng.  
517 Determinants of the efficacy of natural selection on coding and noncoding variability in two passerine  
518 species. *Genome Biol Evol*, 9(11):2987–3007, 2017.
- 519 [16] J Damuth. A macroevolutionary explanation for energy equivalence in the scaling of body size and  
520 population density. *Am Nat*, 169(5):621–631, 2007.
- 521 [17] J P de Magalhães and J A Costa. A database of vertebrate longevity records and their relation to  
522 other life-history traits. *J Evol Biol*, 22(8):1770–1774, 2009.
- 523 [18] N De Maio, C Schlötterer, and C Kosiol. Linking great apes genome evolution across time scales  
524 using polymorphism-aware phylogenetic models. *Mol Biol Evol*, 30(10):2249–2262, 2013.
- 525 [19] T R Dreszer, G D Wall, D Haussler, and K S Pollard. Biased clustered substitutions in the human  
526 genome: the footprints of male-driven biased gene conversion. *Genome Res*, 17(10):1420–1430, 2007.
- 527 [20] L Duret and P F Arndt. The impact of recombination on nucleotide substitutions in the human  
528 genome. *PLoS Genet*, 4(5):e1000071, 2008.
- 529 [21] A Eyre-Walker. Problems with parsimony in sequences of biased base composition. *J Mol Evol*, 47  
530 (6):686–690, 1998.
- 531 [22] A Eyre-Walker. Evidence of selection on silent site base composition in mammals: potential impli-  
532 cations for the evolution of isochores and junk DNA. *Genetics*, 152(2):675–683, 1999.
- 533 [23] P H Fabre, A Rodrigues, and E J Douzery. Patterns of macroevolution among Primates inferred  
534 from a supermatrix of mitochondrial and nuclear DNA. *Mol Phylogenet Evol*, 53(3):808–825, 2009.
- 535 [24] P H Fabre, L Hautier, D Dimitrov, and E J Douzery. A glimpse on the pattern of rodent diversifi-  
536 cation: a phylogenetic approach. *BMC Evol Biol*, 12:88, 2012.

- 537 [25] E Figuet, M Ballenghien, J Romiguier, and N Galtier. Biased gene conversion and GC-content  
538 evolution in the coding sequences of reptiles and vertebrates. *Genome Biol Evol*, 7(1):240–250,  
539 2014.
- 540 [26] E Figuet, J Romiguier, J Y Dutheil, and N Galtier. Mitochondrial DNA as a tool for reconstructing  
541 past life-history traits in mammals. *J Evol Biol*, 27(5):899–910, 2014.
- 542 [27] E Figuet, M Ballenghien, N Lartillot, and N Galtier. Reconstruction of body mass  
543 evolution in the Cetartiodactyla and mammals using phylogenomic data. *bioRxiv*, doi:  
544 <https://doi.org/10.1101/139147>, peer-reviewed and recommended by Peer Community In Evolu-  
545 tionary Biology, <https://evolbiol.peercommunityin.org/articles/rec?id=67>, 2017.
- 546 [28] N Galtier and L Duret. Adaptation or biased gene conversion? extending the null hypothesis of  
547 molecular evolution. *Trends Genet*, 23(6):273–277, 2007.
- 548 [29] N Galtier and M Rousselle. How much does  $n_e$  vary among species? *Genetics*, 216(2):559–572,  
549 2020.
- 550 [30] N Galtier, G Piganeau, D Mouchiroud, and L Duret. GC-content evolution in mammalian genomes:  
551 the biased gene conversion hypothesis. *Genetics*, 159(2):907–911, 2001.
- 552 [31] N Galtier, E Bazin, and N Bierne. GC-biased segregation of noncoding polymorphisms in *Drosophila*.  
553 *Genetics*, 172(1):221–228, 2006.
- 554 [32] N Galtier, L Duret, S Glémin, and V Ranwez. GC-biased gene conversion promotes the fixation of  
555 deleterious amino acid changes in primates. *Trends Genet*, 25(1):1–5, 2009.
- 556 [33] N Galtier, C Roux, M Rousselle, J Romiguier, E Figuet, S Glémin, N Bierne, and L Duret. Codon  
557 usage bias in animals: Disentangling the effects of natural selection, effective population size, and  
558 GC-biased gene conversion. *Mol Biol Evol*, 35(5):1092–1103, 2018.
- 559 [34] Maud Gautier. *La recombinaison comme moteur de l'évolution des génomes : caractérisation de la*  
560 *conversion génique biaisée chez la souris*. PhD thesis, Ecole Doctorale E2M2, Université Claude  
561 Bernard Lyon 1, 9 2019.
- 562 [35] S Glémin, P F Arndt, P W Messer, D Petrov, N Galtier, and L Duret. Quantification of GC-biased  
563 gene conversion in the human genome. *Genome Res*, 25(8):1215–1228, 2015.
- 564 [36] L Guéguen, S Gaillard, B Boussau, M Gouy, M Groussin, N C Rochette, T Bigot, D Fournier,  
565 F Pouyet, V Cahais, A Bernard, C Scornavacca, B Nabholz, A Haudry, L Dachary, N Galtier,  
566 K Belkhir, and J Y Dutheil. Bio++: efficient extensible libraries and tools for computational  
567 molecular evolution. *Mol Biol Evol*, 30(8):1745–1750, 2013.
- 568 [37] A Hassanin, F Delsuc, A Ropiquet, C Hammer, B Jansen van Vuuren, C Matthee, M Ruiz-Garcia,  
569 F Catzeflis, V Areskoug, T T Nguyen, and A Couloux. Pattern and timing of diversification of Cetar-  
570 tiodactyla (Mammalia, Laurasiatheria), as revealed by a comprehensive analysis of mitochondrial  
571 genomes. *C R Biol*, 335(1):32–50, 2012.
- 572 [38] C D Huber, B Y Kim, C D Marsden, and K E Lohmueller. Determining the factors driving selective  
573 effects of new nonsynonymous mutations. *Proc Natl Acad Sci U S A*, 114(17):4465–4470, 2017.
- 574 [39] A J Jeffreys and C A May. Intense and highly localized gene conversion activity in human meiotic  
575 crossover hot spots. *Nat Genet*, 36(2):151–156, 2004.

- 576 [40] M I Jensen-Seaman, T S Furey, B A Payseur, Y Lu, K M Roskin, C F Chen, M A Thomas,  
577 D Haussler, and H J Jacob. Comparative recombination rates in the rat, mouse, and human  
578 genomes. *Genome Res*, 14(4):528–538, 2004.
- 579 [41] J Lachance and S A Tishkoff. Biased gene conversion skews allele frequencies in human populations,  
580 increasing the disease burden of recessive alleles. *Am J Hum Genet*, 95(4):408–420, 2014.
- 581 [42] N Lartillot. Interaction between selection and biased gene conversion in mammalian protein-coding  
582 sequence evolution revealed by a phylogenetic covariance analysis. *Mol Biol Evol*, 30(2):356–368,  
583 2012.
- 584 [43] N Lartillot. Phylogenetic patterns of GC-biased gene conversion in placental mammals and the  
585 evolutionary dynamics of recombination landscapes. *Mol Biol Evol*, 30(3):489–502, 2013.
- 586 [44] F Lassalle, S Périan, T Bataillon, X Nesme, L Duret, and V Daubin. GC-content evolution in  
587 bacterial genomes: the biased gene conversion hypothesis expands. *PLoS Genet*, 11(2):e1004941,  
588 2015.
- 589 [45] T Latrille, L Duret, and N Lartillot. The Red Queen model of recombination hot-spot evolution: a  
590 theoretical investigation. *Philos Trans R Soc Lond B Biol Sci*, 372(1736):20160463, 2017.
- 591 [46] Y Leseqque, S Glémin, N Lartillot, D Mouchiroud, and L Duret. The red queen model of recombina-  
592 tion hotspots evolution in the light of archaic and modern human genomes. *PLoS Genet*, 10(11):  
593 e1004790, 2014.
- 594 [47] R Li, E Bitoun, N Altemose, R W Davies, B Davies, and S R Myers. A high-resolution map of  
595 non-crossover events reveals impacts of genetic diversity on mammalian meiotic recombination. *Nat*  
596 *Commun*, 10(1):3900, 2019.
- 597 [48] H Long, W Sung, S Kucukyildirim, E Williams, S F Miller, W Guo, C Patterson, C Gregory,  
598 C Strauss, C Stone, C Berne, D Kysela, W R Shoemaker, M E Muscarella, H Luo, J T Lennon,  
599 Y V Brun, and M Lynch. Evolutionary determinants of genome-wide nucleotide composition. *Nat*  
600 *Ecol Evol*, 2(2):237–240, 2018.
- 601 [49] E Mancera, R Bourgon, A Brozzi, W Huber, and L M Steinmetz. High-resolution mapping of  
602 meiotic crossovers and non-crossovers in yeast. *Nature*, 454(7203):479–485, 2008.
- 603 [50] G A McVean, S R Myers, S Hunt, P Deloukas, D R Bentley, and P Donnelly. The fine-scale structure  
604 of recombination rate variation in the human genome. *Science*, 304(5670):581–584, 2004.
- 605 [51] M Meyer, M Kircher, M T Gansauge, H Li, F Racimo, S Mallick, J G Schraiber, F Jay, K Prüfer,  
606 C de Filippo, P H Sudmant, C Alkan, Q Fu, R Do, N Rohland, A Tandon, M Siebauer, R E  
607 Green, K Bryc, A W Briggs, U Stenzel, J Dabney, J Shendure, J Kitzman, M F Hammer, M V  
608 Shunkov, A P Derevianko, N Patterson, A M Andrés, E E Eichler, M Slatkin, D Reich, J Kelso,  
609 and S Pääbo. A high-coverage genome sequence from an archaic Denisovan individual. *Science*, 338  
610 (6104):222–226, 2012.
- 611 [52] B Milholland, X Dong, L Zhang, X Hao, Y Suh, and J Vijg. Differences between germline and  
612 somatic mutation rates in humans and mice. *Nat Commun*, 8:15183, 2017.
- 613 [53] P A Moran. Notes on continuous stochastic phenomena. *Biometrika*, 37(1):17–23, 1950.
- 614 [54] D Mouchiroud, C Gautier, and G Bernardi. The compositional distribution of coding sequences and  
615 DNA molecules in humans and murids. *J Mol Evol*, 27(4):311–320, 1988.

- 616 [55] C F Mugal, P F Arndt, and H Ellegren. Twisted signatures of GC-biased gene conversion embedded  
617 in an evolutionary stable karyotype. *Mol Biol Evol*, 30(7):1700–1712, 2013.
- 618 [56] C F Mugal, V E Kutschera, F Botero-Castro, J B W Wolf, and I Kaj. Polymorphism data assist  
619 estimation of the nonsynonymous over synonymous fixation rate ratio  $\omega$  for closely related species.  
620 *Mol Biol Evol*, 37(1):260–279, 2020.
- 621 [57] S Myers, R Bowden, A Tumian, R E Bontrop, C Freeman, T S MacFie, G McVean, and P Donnelly.  
622 Drive against hotspot motifs in primates implicates the PRDM9 gene in meiotic recombination.  
623 *Science*, 327(5967):876–879, 2010.
- 624 [58] B Nabholz, A Künstner, R Wang, E D Jarvis, and H Ellegren. Dynamic evolution of base compo-  
625 sition: causes and consequences in avian phylogenomics. *Mol Biol Evol*, 28(8):2197–2210, 2011.
- 626 [59] A Necşulea, A Popa, D N Cooper, P D Stenson, D Mouchiroud, C Gautier, and L Duret. Meiotic  
627 recombination favors the spreading of deleterious mutations in human populations. *Hum Mutat*, 32  
628 (2):198–206, 2011.
- 629 [60] S I Nikolaev, J I Montoya-Burgos, K Popadin, L Parand, Margulies EH, and S E Antonarakis. Life-  
630 history traits drive the evolutionary rates of mammalian coding and noncoding genomic elements.  
631 *Proc Natl Acad Sci U S A*, 104(51):20443–20448, 2007.
- 632 [61] E Pessia, A Popa, S Mousset, C Rezvoy, L Duret, and G A Marais. Evidence for widespread  
633 GC-biased gene conversion in eukaryotes. *Genome Biol Evol*, 4(7):675–682, 2012.
- 634 [62] K Popadin, L V Polishchuk, L Mamirova, D Knorre, and K Gunbin. Accumulation of slightly  
635 deleterious mutations in mitochondrial protein-coding genes of large versus small mammals. *Proc*  
636 *Natl Acad Sci U S A*, 104(33):13390–13395, 2007.
- 637 [63] D Posada and T R Buckley. Model selection and model averaging in phylogenetics: advantages of  
638 akaike information criterion and bayesian approaches over likelihood ratio tests. *Syst Biol*, 53(5):  
639 793–808, 2004.
- 640 [64] R Pracana, A D Hargreaves, J F Mulley, and P W H Holland. Runaway GC evolution in gerbil  
641 genomes. *Mol Biol Evol*, 37(8):2197–2210, 2020.
- 642 [65] F Pratto, K Brick, P Khil, F Smagulova, G V Petukhova, and R D Camerini-Otero. DNA recom-  
643 bination; recombination initiation maps of individual human genomes. *Science*, 346(6211):1256442,  
644 2014.
- 645 [66] A Ratnakumar, S Mousset, S Glémin, J Berglund, N Galtier, L Duret, and M T Webster. Detecting  
646 positive selection within genomes: the problem of biased gene conversion. *Philos Trans R Soc Lond*  
647 *B Biol Sci*, 365(1552):2571–2580, 2010.
- 648 [67] M Robinson, C Gautier, and D Mouchiroud. Evolution of isochores in rodents. *Mol Biol Evol*, 14  
649 (8):823–828, 1997.
- 650 [68] M C Robinson, E A Stone, and N D Singh. Population genomic analysis reveals no evidence for  
651 GC-biased gene conversion in *Drosophila melanogaster*. *Mol Biol Evol*, 31(2):425–433, 2014.
- 652 [69] J Romiguier, V Ranwez, E J Douzery, and N Galtier. Contrasting GC-content dynamics across 33  
653 mammalian genomes: relationship with life-history traits and chromosome sizes. *Genome Res*, 20  
654 (8):1001–1009, 2010.

- 655 [70] J Romiguier, E Figuet, N Galtier, E J Douzery, B Boussau, J Y Dutheil, and V Ranwez. Fast and  
656 robust characterization of time-heterogeneous sequence evolutionary processes using substitution  
657 mapping. *PLoS One*, 7(3):e33852, 2012.
- 658 [71] J Romiguier, V Ranwez, E J Douzery, and N Galtier. Genomic evidence for large, long-lived  
659 ancestors to placental mammals. *Mol Biol Evol*, 30(1):5–13, 2013.
- 660 [72] J Romiguier, J Lourenco, P Gayral, N Faivre, L A Weinert, S Ravel, M Ballenghien, V Cahais,  
661 A Bernard, E Loire, L Keller, and N Galtier. Population genomics of eusocial insects: the costs of  
662 a vertebrate-like effective population size. *J Evol Biol*, 27(3):593–603, 2014.
- 663 [73] M Rousselle, A Laverré, E Figuet, B Nabholz, and N Galtier. Influence of recombination and GC-  
664 biased gene conversion on the adaptive and nonadaptive substitution rate in mammals versus birds.  
665 *Mol Biol Evol*, 36(3):458–471, 2019.
- 666 [74] C Scornavacca, K Belkhir, J Lopez, R Dernas, F Delsuc, E J P Douzery, and V Ranwez. Orthomam  
667 v10: Scaling-up orthologous coding sequence and exon alignments with more than one hundred  
668 mammalian genomes. *Mol Biol Evol*, 36(4):861–862, 2019.
- 669 [75] T C A Smith, P F Arndt, and A Eyre-Walker. Large scale variation in the rate of germ-line de  
670 novo mutation, base composition, divergence and diversity in humans. *PLoS Genet*, 14(3):e1007254,  
671 2018.
- 672 [76] C C Spencer, P Deloukas, S Hunt, J Mullikin, S Myers, B Silverman, P Donnelly, D Bentley, and  
673 G McVean. The influence of recombination on human genetic diversity. *PLoS Genet*, 2(9):e148,  
674 2006.
- 675 [77] D Vanderpool, B Q Minh, R Lanfear, D Hughes, S Murali, R A Harris, M Raveendran, D M  
676 Muzny, M S Hibbins, R J Williamson, R A Gibbs, K C Worley, J Rogers, and M W Hahn. Primate  
677 phylogenomics uncovers multiple rapid radiations and ancient interspecific introgression. *PLoS Biol*,  
678 18(12):e3000954, 2020.
- 679 [78] A Wallberg, S Glémin, and M T Webster. Extreme recombination frequencies shape genome varia-  
680 tion and evolution in the honeybee, *Apis mellifera*. *PLoS Genet*, 11(4):e1005189, 2015.
- 681 [79] R J Wang, G W C Thomas, M Raveendran, R A Harris, H Doddapaneni, D M Muzny, J P Capitanio,  
682 P Radivojac, J Rogers, and M W Hahn. Paternal age in rhesus macaques is positively associated  
683 with germline mutation accumulation but not with measures of offspring sociability. *Genome Res*,  
684 30(6):826–834, 2020.
- 685 [80] M T Webster and N G Smith. Fixation biases affecting human SNPs. *Trends Genet*, 20(3):122–126,  
686 2004.
- 687 [81] J J Welch, A Eyre-Walker, and D Waxman. Divergence and polymorphism under the nearly neutral  
688 theory of molecular evolution. *J Mol Evol*, 67(4):418–426, 2008.
- 689 [82] L Wilfert, J Gadau, and P Schmid-Hempel. Variation in genomic recombination rates among animal  
690 taxa and the case of social insects. *Heredity (Edinb)*, 98(4):189–197, 2007.
- 691 [83] A L Williams, G Genovese, T Dyer, N Altemose, K Truax, G Jun, N Patterson, S R Myers, J E  
692 Curran, R Duggirala, J Blangero, D Reich, and Przeworski M. Non-crossover gene conversions show  
693 strong GC bias and unexpected clustering in humans. *Elife*, 4:e04637, 2015.
